# Supplementary material for: Intracellular consequences of SOS1 deficiency during salt stress
Source: Oxford University Press journal article supplement (doi:10.1093/jxb/erp391), 2010-01-06
Supplement: erp391_Supplementary_Data.zip [file erp391_Supplementary_Data.zip]

**J. Exp. Botany**

Supplement Figures and tables for

## **Intracellular Consequences of SOS1 Deficiency during Salt Stress**

**Dong-Ha Oh<sup>\*</sup>, Sang Yeol Lee<sup>\*</sup>, Ray A. Bressan<sup>‡, #</sup>, Dae-Jin Yun<sup>\*, #</sup>, Hans J. Bohnert<sup>†, #, \*\*</sup>**

<sup>\*</sup>Division of Applied Life Science (BK21 program) and Environmental Biotechnology  
National Core Research Center, Graduate School of Gyeongsang National  
University, Jinju 660-701, Korea

<sup>†</sup>Departments of Plant Biology and of Crop Sciences, University of Illinois at Urbana  
Champaign, Urbana, IL 61801, USA

<sup>‡</sup>Department of Horticulture and Landscape Architecture, Purdue University, West  
Lafayette, IN 47907, USA

<sup>#</sup>WCU Program, Division of Applied Life Sciences, Gyeongsang National University,  
Jinju 660-701, Korea

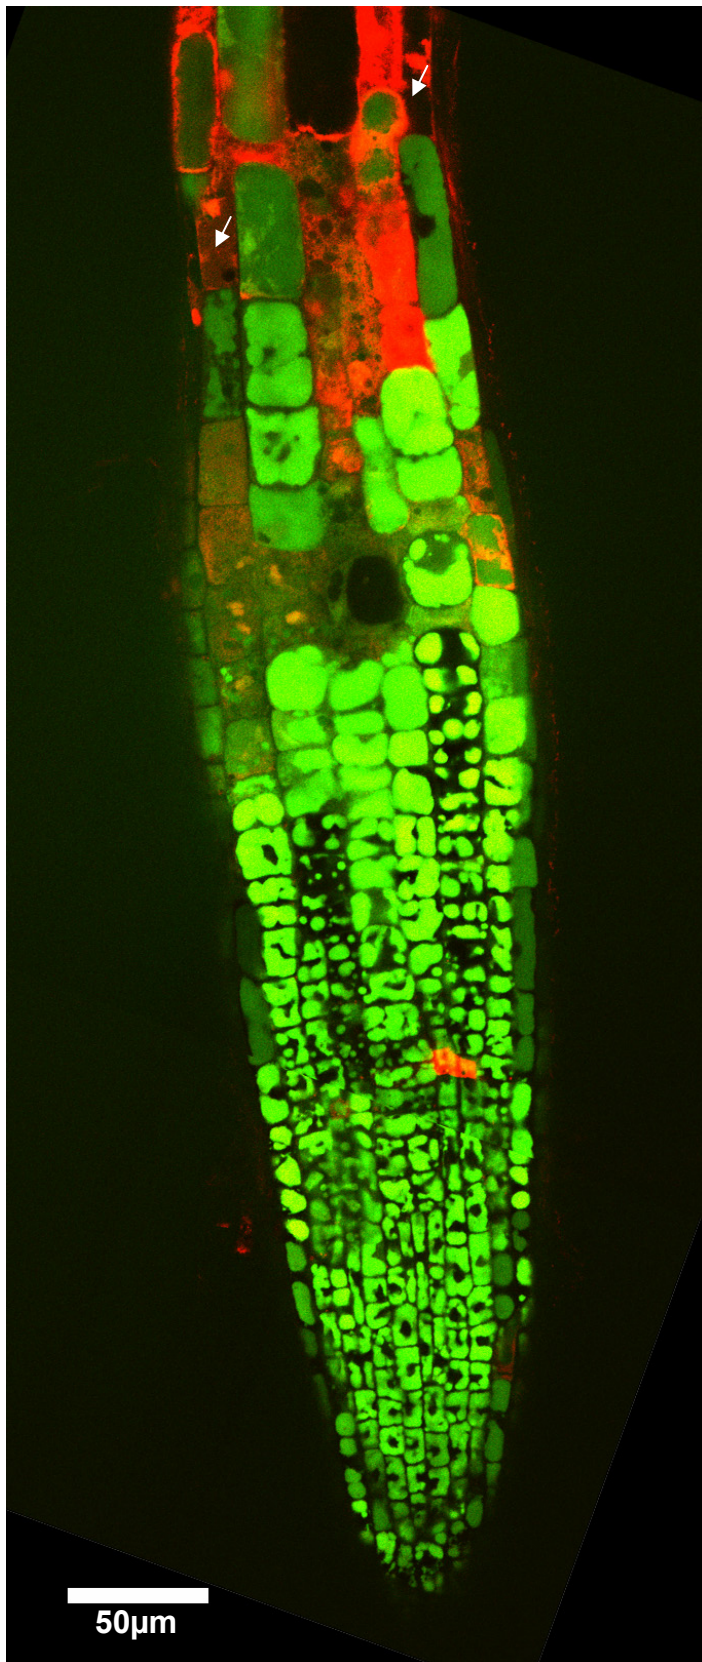

### **Supplementary Figure 1**

#### **Col3 root at higher sodium concentration**

Col3 roots were incubated at 200mM NaCl for 12 hrs and stained with CoroNa Green and propidium iodide. Arrows indicate dead cells. The CoroNa green intensities were recorded with 10% weaker sensitivity than that used in Figure 1 and 2, to avoid severe saturation of the fluorescence signal.

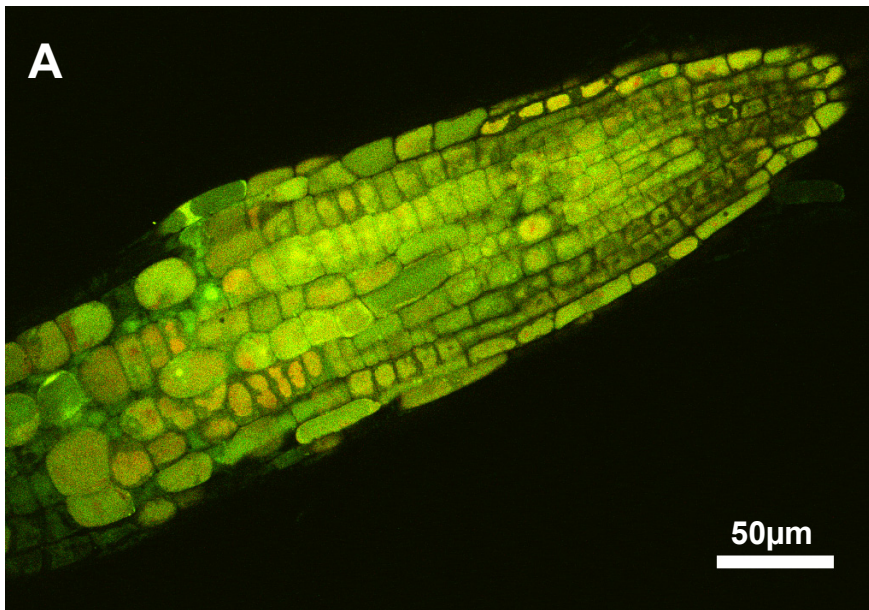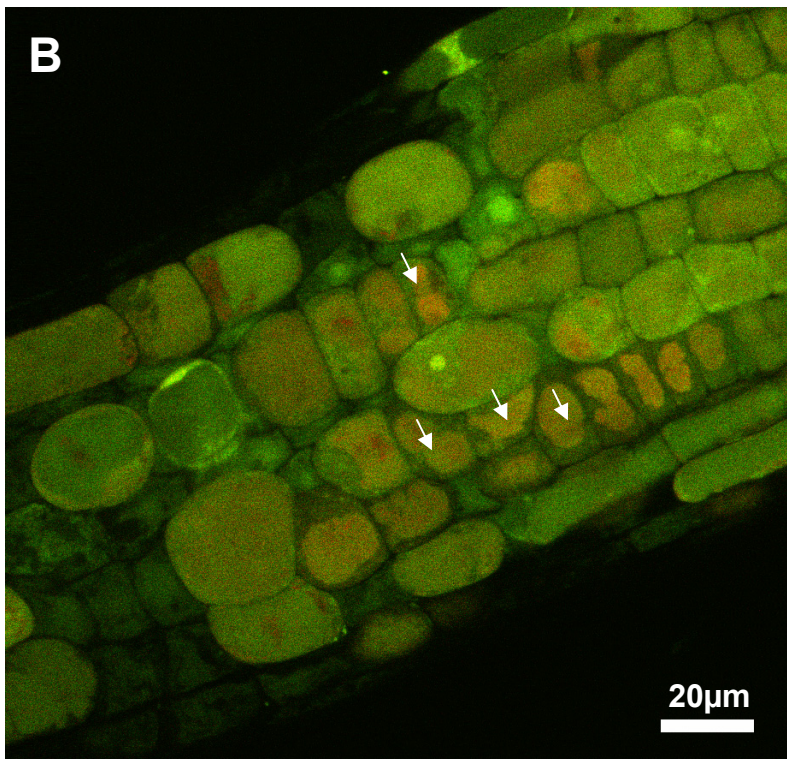

**Supplementary Figure 2. Intracellular pH of Col3 root cells under higher sodium concentration**

**A.** Col3 root were incubated at 200mM NaCl for 12 h and stained with carboxyl SNARF pH indicator. **B.** Magnification of A. Arrows indicate alkalized vacuoles.



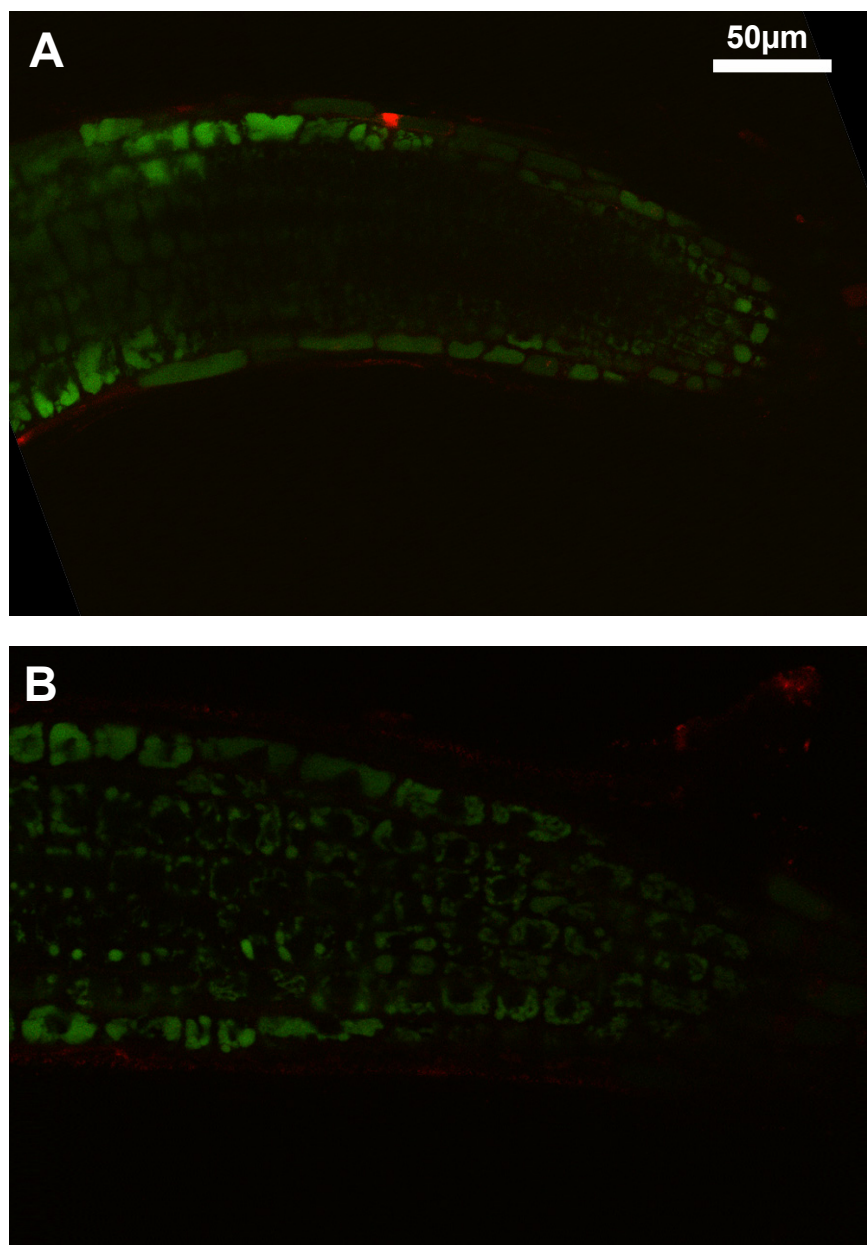

**Supplementary Figure 3. CoroNa Green negative controls.**

Col3 (A) and sos1-1 (B) root cells stained with CoroNa Green with no NaCl added in the media. Confocal planes showing epidermis and cortex cells of the root tip region were shown with the microscope setting the same as used in Figure 2A-D.

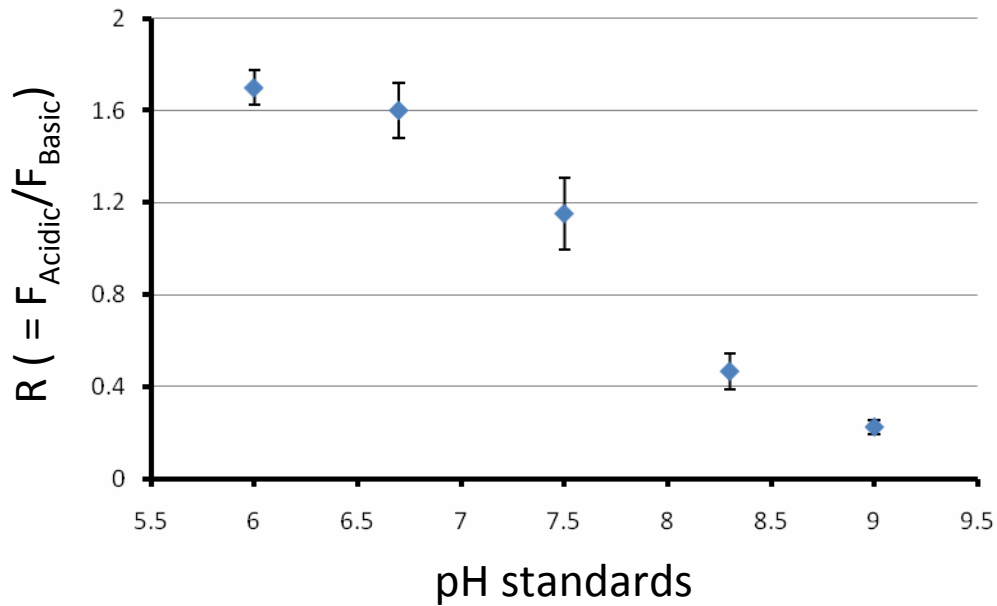

#### Supplementary Figure 4. Determination of pH with carboxy SNARF pH indicator

The ratios of fluorescence intensities from acidic and basic channels were indicated for standard pHs of 6.0, 6.7, 7.5, 8.3 and 9.0. Error bars are standard deviation (n=12). The formula to calculate the pH was generated using the ratios from standard pHs 6.0 and 9.0 as the acidic and basic endpoints, respectively, following the supplier's manual (Invitrogen, MP01270):  $\text{pH} = 7.5 - \text{Log}(0.52(R-0.22)/(1.70-R))$

**Supplementary table 1: Complete list of qRT-PCR results**

|                          | Col3       |            |            | <i>atsos1-1</i> |             |              |
|--------------------------|------------|------------|------------|-----------------|-------------|--------------|
| 100mM NaCl (hrs)         | 0          | 2          | 8          | 0               | 2           | 8            |
| <b>NHXs</b>              |            |            |            |                 |             |              |
| NHX1 (At5g27150)         | 1.00 ±0.02 | 1.33 ±0.17 | 1.05 ±0.13 | 0.99 ±0.11      | 1.31 ±0.21  | 0.88 ±0.08   |
| NHX2 (At3g05030)         | 1.00 ±0.09 | 1.41 ±0.49 | 1.14 ±0.23 | 0.93 ±0.12      | 1.17 ±0.27  | 0.45 ±0.03   |
| NHX3 (At5g55470)         | 1.00 ±0.07 | 1.03 ±0.12 | 1.13 ±0.42 | 0.83 ±0.23      | 4.25 ±1.58  | 1.24 ±0.19   |
| NHX4 (At3g06370)         | 1.00 ±0.09 | 1.02 ±0.18 | 0.70 ±0.10 | 0.71 ±0.34      | 1.69 ±0.32  | 2.46 ±0.67   |
| NHX5 (At1g54370)         | 1.00 ±0.02 | 0.76 ±0.15 | 0.68 ±0.14 | 1.06 ±0.06      | 0.94 ±0.17  | 0.70 ±0.31   |
| NHX6 (At1g79610)         | 1.00 ±0.04 | 1.25 ±0.15 | 1.18 ±0.10 | 0.98 ±0.11      | 1.37 ±0.05  | 1.39 ±0.30   |
| NHX8 (At1g14660)         | 1.00 ±0.11 | 0.81 ±0.19 | 0.76 ±0.25 | 1.03 ±0.19      | 1.25 ±0.07  | 1.73 ±0.28   |
| <b>Ca2+ transporters</b> |            |            |            |                 |             |              |
| CAX1 (At2g38170)         | 1.00 ±0.06 | 0.66 ±0.11 | 0.86 ±0.22 | 0.76 ±0.13      | 0.72 ±0.07  | 2.12 ±0.12   |
| CAX2 (At3g13320)         | 1.00 ±0.07 | 1.12 ±0.07 | 0.96 ±0.08 | 0.90 ±0.10      | 2.09 ±0.28  | 1.45 ±0.19   |
| CAX4 (At5g01490)         | 1.00 ±0.06 | 1.17 ±0.36 | 1.30 ±0.25 | 0.99 ±0.19      | 6.71 ±1.01  | 56.73 ±13.19 |
| ACA1 (At1g27770)         | 1.00 ±0.08 | 1.13 ±0.57 | 0.96 ±0.31 | 1.15 ±0.29      | 6.49 ±0.37  | 10.32 ±2.79  |
| CNGC19 (At3g17690)       | 1.00 ±0.04 | 5.00 ±2.57 | 1.92 ±1.65 | 0.87 ±0.32      | 26.75 ±8.18 | 22.76 ±12.49 |
| CNGC14 (At2g24610)       | 1.00 ±0.06 | 1.01 ±0.18 | 0.94 ±0.15 | 0.83 ±0.08      | 1.08 ±0.22  | 1.54 ±0.33   |
| 5PTase2 (At4g18010)      | 1.00 ±0.03 | 1.53 ±0.51 | 0.95 ±0.19 | 0.74 ±0.13      | 2.64 ±0.29  | 3.29 ±0.28   |
| <b>Regulation of PH</b>  |            |            |            |                 |             |              |
| AHA1 (At2g18960)         | 1.00 ±0.05 | 0.99 ±0.05 | 1.10 ±0.06 | 1.06 ±0.06      | 0.80 ±0.09  | 0.35 ±0.04   |
| AHA2 (At4g30190)         | 1.00 ±0.05 | 0.84 ±0.16 | 1.09 ±0.09 | 1.11 ±0.27      | 0.49 ±0.24  | 0.19 ±0.05   |
| VHA-A (At1g78900)        | 1.00 ±0.02 | 0.95 ±0.12 | 0.86 ±0.07 | 1.02 ±0.05      | 0.94 ±0.08  | 0.72 ±0.10   |
| AVA-P4 (At1g75630)       | 1.00 ±0.05 | 0.89 ±0.23 | 0.78 ±0.13 | 1.02 ±0.08      | 0.78 ±0.20  | 0.25 ±0.07   |
| AVP1 (At1g15690)         | 1.00 ±0.04 | 1.03 ±0.05 | 0.98 ±0.06 | 0.93 ±0.08      | 0.80 ±0.04  | 0.30 ±0.03   |
| AVP2 (At1g78920)         | 1.00 ±0.05 | 1.08 ±0.11 | 1.15 ±0.07 | 1.24 ±0.18      | 1.29 ±0.08  | 0.81 ±0.08   |
| <b>K+ transporters</b>   |            |            |            |                 |             |              |
| HKT1 (At4g10310)         | 1.00 ±0.04 | 0.63 ±0.23 | 0.24 ±0.02 | 0.27 ±0.12      | 0.13 ±0.03  | 0.01 ±0.00   |
| AKT1 (At2g26650)         | 1.00 ±0.04 | 0.96 ±0.09 | 0.87 ±0.04 | 0.97 ±0.16      | 0.87 ±0.09  | 0.81 ±0.32   |
| KC1 (At4g32650)          | 1.00 ±0.04 | 0.97 ±0.26 | 1.23 ±0.17 | 0.98 ±0.40      | 1.10 ±0.16  | 1.00 ±0.06   |
| CNGC5 (At4g32650)        | 1.00 ±0.07 | 0.93 ±0.21 | 0.83 ±0.17 | 1.00 ±0.03      | 0.87 ±0.09  | 0.51 ±0.14   |
| KUP1 (At2g30070)         | 1.00 ±0.05 | 1.16 ±0.14 | 1.43 ±0.20 | 1.11 ±0.07      | 2.25 ±0.91  | 1.99 ±0.40   |
| TRH1 (At4g23640)         | 1.00 ±0.06 | 1.01 ±0.15 | 0.91 ±0.18 | 0.83 ±0.24      | 0.98 ±0.14  | 0.68 ±0.20   |
| TPK1 (At5g55630)         | 1.00 ±0.02 | 1.04 ±0.00 | 0.80 ±0.09 | 1.10 ±0.07      | 0.87 ±0.03  | 0.46 ±0.01   |
| KEA2 (At4g00630)         | 1.00 ±0.04 | 0.80 ±0.04 | 1.05 ±0.10 | 1.10 ±0.11      | 0.91 ±0.20  | 0.40 ±0.01   |

## Supplementary table 1 (continued)

| 100mM NaCl (hrs)              | Col3       |            |            | <i>atsos1-1</i> |             |             |
|-------------------------------|------------|------------|------------|-----------------|-------------|-------------|
|                               | 0          | 2          | 8          | 0               | 2           | 8           |
| <b>Membrane trafficking</b>   |            |            |            |                 |             |             |
| ACT2 (At3g18780)              | 1.00 ±0.02 | 0.82 ±0.15 | 0.64 ±0.06 | 1.06 ±0.15      | 0.70 ±0.09  | 0.40 ±0.09  |
| GNOM (At1g13980)              | 1.00 ±0.03 | 1.03 ±0.08 | 0.88 ±0.11 | 0.80 ±0.06      | 0.87 ±0.07  | 0.23 ±0.03  |
| SYP111 (At1g08560)            | 1.00 ±0.04 | 0.59 ±0.10 | 0.69 ±0.05 | 0.90 ±0.10      | 0.55 ±0.14  | 0.11 ±0.02  |
| SYP121 (At3g11820)            | 1.00 ±0.06 | 1.34 ±0.20 | 1.03 ±0.32 | 1.03 ±0.18      | 8.61 ±0.71  | 12.91 ±6.70 |
| SYP122 (At3g11820)            | 1.00 ±0.10 | 1.29 ±0.10 | 0.78 ±0.18 | 0.93 ±0.36      | 7.78 ±2.31  | 14.13 ±2.15 |
| EXO70B1 (At5g58430)           | 1.00 ±0.02 | 1.05 ±0.04 | 0.82 ±0.13 | 0.79 ±0.16      | 4.19 ±1.06  | 1.89 ±0.16  |
| EXO70C1 (At5g13150)           | 1.00 ±0.08 | 0.95 ±0.11 | 0.97 ±0.17 | 0.72 ±0.18      | 0.60 ±0.06  | 0.45 ±0.07  |
| EXO70H7 (At5g59730)           | 1.00 ±0.14 | 1.35 ±0.46 | 0.62 ±0.19 | 1.12 ±0.20      | 11.59 ±3.74 | 6.72 ±0.82  |
| Chlathrin Adaptor (At1g60970) | 1.00 ±0.11 | 1.32 ±0.72 | 1.35 ±0.46 | 1.22 ±0.20      | 2.86 ±2.16  | 7.31 ±4.35  |
| PIN1 (At1g73590)              | 1.00 ±0.03 | 1.09 ±0.78 | 1.18 ±0.33 | 0.96 ±0.09      | 1.32 ±0.39  | 1.59 ±0.27  |
| <b>Aquaporins</b>             |            |            |            |                 |             |             |
| PIP1;1 (At3g61430)            | 1.00 ±0.03 | 0.94 ±0.59 | 0.51 ±0.16 | 1.00 ±0.15      | 0.98 ±0.68  | 0.18 ±0.14  |
| PIP2;1 (At3g53420)            | 1.00 ±0.04 | 1.21 ±0.80 | 0.64 ±0.18 | 0.95 ±0.13      | 1.45 ±1.08  | 0.13 ±0.10  |
| TIP1 (At2g36830)              | 1.00 ±0.04 | 1.19 ±0.69 | 0.61 ±0.18 | 0.88 ±0.25      | 0.95 ±0.50  | 0.18 ±0.13  |
| TIP2 (At3g26520)              | 1.00 ±0.01 | 0.63 ±0.27 | 0.53 ±0.05 | 0.83 ±0.13      | 0.62 ±0.13  | 0.11 ±0.06  |

**Supplementary table 2: List of qRT-PCR primers**

|                  |                                 |                  |                              |
|------------------|---------------------------------|------------------|------------------------------|
| AtCytB(690F)     | AGGCACGTCAACAATGGCCAAAA         | HKT1(577F)       | ACGGCGAGAGATGTTCTTAGTTCCAA   |
| AtCytB(785R)     | TGTAGTGTAGCCCTCTCTGATCGAA       | HKT1(687R)       | CATGTTCTCATTCTGTTGGGACAAAT   |
| AtNHX1(1279F)    | CAGCACAGTGGTGTGGTATGCTG         | AKT1(638F)       | TCTTCGAGAGTCGGTGCCTTGTT      |
| AtNHX1(1387R)    | GTATGGATTTTGGGGTGTGTCATCA       | AKT1(741R)       | GCAGCACAATGAACCGCAAAAA       |
| AtNHX2(1131F)    | CAGCATCAAGCAGCAAGTTGTGATC       | AKT1(1031R)      | CCGACTTGTTCCATGGACTACCAAA    |
| AtNHX2(1239R)    | GCGCAATTCTGTGTGCCCTGAT          | AtKC1(929F)      | TGCTTTTCAACATTGGCCTCA        |
| AtNHX3(1012F)    | CACTTCCAGGCATGTATTGCAATG        | AtKC1(1028R)     | TTGATCGCACTCCTCATGGC         |
| AtNHX3(1130R)    | CCCCAAAGCTTAAGCTGCTTGCTT        | AtCNGC5(1471F)   | GCTTTAGTGCGAAGGGTTCCA        |
| AtNHX4(1110F)    | TGCTGCAATGTCAATTTCTAGCTGAGAT    | AtCNGC5(1560R)   | TGTGAACAAGCATGGTTTCAGC       |
| AtNHX4(1214R)    | GACTGACCAGGACTGTTGCGTACAAC      | AtCNGC12(1163F)  | CCAAGGGAACCGAAGAGGAA         |
| AtNHX5(746F)     | GCAGGATTGGACACCGAGAATCTT        | AtCNGC12(1268R)  | AGCCATGGAACACGCTTTAACA       |
| AtNHX5(856R)     | AGAAACAATGCCGGAGAGACCAAC        | AtKUP1(1006F)    | GCGATACCCGAGCCTGTGTT         |
| AtNHX6(1222F)    | TGGCAGGACCTGCTCATAGGAAA         | AtKUP1(1099R)    | TCGAAAACGTTGCGGATATGA        |
| AtNHX6(1327R)    | TGAACAGATTGCAGAGCAAGAGCAA       | AtTRH1(1044F)    | TGCCACGTTCTCGATTGTCA         |
| AtNHX8(1180F)    | TGGTCTGGATTAAGGGGTGCTGTTT       | AtTRH1(1135R)    | TCTGGCCAAGGACCCATCTT         |
| AtNHX8(1285R)    | GGAATAGAAACCTTGTTCCCGTATCTGAA   | AtKEA2(657F)     | TGCAGAAAACCGAAATGCTGA        |
| AtCAX1(781F)     | TGTTTTGTCCGACATGCAACTGAGTA      | AtKEA2(749R)     | ATGGAAAGTCCCGCCTAGC          |
| AtCAX1(1317R)    | AATGTGAACGCTGTGATGATTATGGAA     | ACT2(1730F)      | CAAGCAGCATGAAGATTAAGGTCGTT   |
| AtCAX2(1007F)    | AGACCAAGTCTTTGACAAAGGAATTGCTA   | ACT2(1842R)      | CTTGAGATCCACATCTGCTGGAAT     |
| AtCAX2(1610R)    | AAAAAGCTGGAAGTTAAGGTCCATCTGTT   | At1g13980(1621F) | CTCGATTGTGATATAACTTGCAGCA    |
| At5g01490(1194F) | AATGGGAATAGAAATGGACCTTAACCTCAA  | At1g13980(1720R) | TGTGCATTGCAGACAAAGGACAGT     |
| At5g01490(1293R) | CGAAGTCCCATCCTGTAATACTAAGGAAGTA | AtSYP121(718F)   | GGGAGCTTATCTCGTCCGAGTATAGAGA |
| At1G27770(2171F) | CTGGCATCACTGTCAGAATGGTGA        | AtSYP121(836R)   | TCTCTCACTCTCTCCAGTGGAATCAGT  |
| At1G27770(2270R) | TCGATAGCTATGCCATCATCAGTCAATAT   | AtSYP111(475F)   | AAGGCTCTCTGGGACTCCGGTTT      |
| At3g17690(1152F) | TTCCGAGGAAAGTTTCTCCTTGACAT      | AtSYP111(582R)   | ATCTTTTGCCTCAGCCCTGAAA       |
| At3g17690(1251R) | CTTCCCTGCGTGTGCCTAAGTGTA        | EXO70C1(1099F)   | ATTAACTGGCTCAGACGCGGCTA      |
| At2g24610(1508F) | GTTGACGAGGAAACCATTCTTCATTCA     | EXO70C1(1199R)   | CTCGGTACCGGAGTTCGTCCATTAT    |
| At2g24610(1607R) | CAAATAGCGGTACACGACGAACAAGAT     | EXO70H7(1354F)   | GCCGTTGCCGGATTCTTTATACAT     |
| At4g18010(544F)  | CATTATCGGGTTTCAAGAAGTGGT        | EXO70H7(1459R)   | CGTGAGTAAAATCACCAAGCGATAC    |
| At4g18010(643R)  | TCTACGAATTATCGATTCCCATTTTCG     | AtTIP1(376F)     | GGTGGCTTGGCTGTGCC            |
| AtAHA1(2730F)    | GACATTTTGAAGTTTGCCATTCGGTAT     | AtTIP1(466R)     | CAAGCCCGAATGTATCACG          |
| AtAHA1(2840R)    | CTTTCTCCAATACCGTAATCTTTCTTGTT   | AtPIP1_1(679F)   | ATCCCAATCACTGGCACAGG         |
| AtAHA2(2425F)    | CATTAGTCAAGCTCTGATCTTCGTCACAA   | AtPIP1_1(778R)   | CCCCAACACCCAGTGGTCA          |
| AtAHA2(2516R)    | CAATGAGGAAAGCAATCATCAGCAAT      | AtPIP2_1(656F)   | CCATTCCCATTACCGGAACC         |
| AtAVA_P4(158F)   | CGGCGAAGAGTGGAGTTGGAGTT         | AtPIP2_1(760R)   | CAACCCAAAATATCCAGTGGTCA      |
| AtAVA_P4(275R)   | GCGATGATCAAACATAAATACCTAACACA   | AtTIP2(378F)     | CGGTGGCGAGCCAATTC            |
| AtAVP1(1734F)    | GGAACACCACTGCTGCTATTGGAA        | AtTIP2(477R)     | GGTGTAGACGAGCCCGAAGG         |
| AtAVP1(1854R)    | GGGTCAAACATCTACGGTGTGGAT        |                  |                              |
| AtAVP2(1949F)    | TCGGGTCTAGTGGACGAAAATGGTAT      |                  |                              |
| AtAVP2(2051R)    | CCATAGTAAGGACATAAGCTGCAGTGCTT   |                  |                              |
